# Supplementary material for: Preparation and characterization of hierarchically porous hybrid gels for efficient dye adsorption
Source: PubMed Central journal article supplement — RSC Adv. 2024 Sep 16;14(40):29384–94. doi: 10.1039/d4ra05844e (PMC11404308; doi:10.1039/d4ra05844e), 2024-09-16
Supplement: RA-014-D4RA05844E-s001.pdf [file RA-014-D4RA05844E-s001.pdf]

Table S1. Pore size statistics of HPHG

|                 | Size of holes              |                |              |
|-----------------|----------------------------|----------------|--------------|
|                 | Macropore(nm)              | micropore(nm)  | nanopore(nm) |
| <b>0ZIF-8</b>   | $2.0 \times 10^5 \pm 6300$ | $4385 \pm 823$ | $195 \pm 76$ |
| <b>0.1ZIF-8</b> | $1.8 \times 10^5 \pm 3900$ | $3258 \pm 638$ | $125 \pm 48$ |
| <b>0.3ZIF-8</b> | $1.3 \times 10^5 \pm 3700$ | $2048 \pm 546$ | $68 \pm 37$  |
| <b>1ZIF-8</b>   | $1.2 \times 10^5 \pm 2900$ | $1845 \pm 398$ | $48 \pm 28$  |

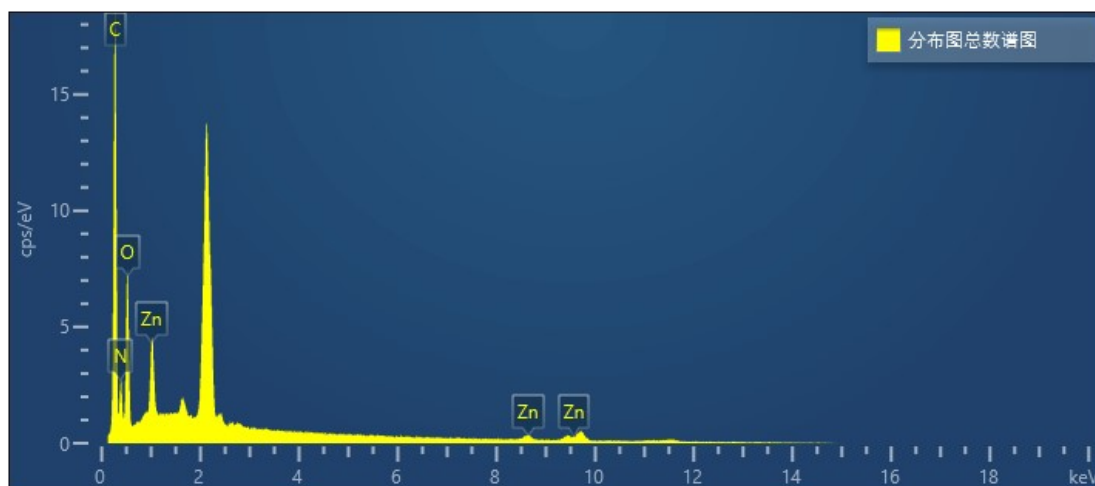

Figure S1. EDS element distribution curve.

Table S2. Element distribution statistics of HPHG.

| Element              | Line type | wt%    | Wt % Sigma | At%    |
|----------------------|-----------|--------|------------|--------|
| <b>C</b>             | K         | 49.06  | 0.46       | 57.03  |
| <b>N</b>             | K         | 20.38  | 0.62       | 20.31  |
| <b>O</b>             | K         | 24.46  | 0.33       | 21.35  |
| <b>Z<sub>n</sub></b> | L         | 6.09   | 0.15       | 1.30   |
| <b>Total</b>         |           | 100.00 |            | 100.00 |

Table S3. BET data statistics of HPHG.

| Concentration | BET Area(m <sup>2</sup> /g) | Surface BJH Adsorption volume of pores (cm <sup>3</sup> /g) | cumulative Pore Size(nm) |
|---------------|-----------------------------|-------------------------------------------------------------|--------------------------|
| 0.1ZIF-8      | 1.5415                      | 0.020492                                                    | 70.5409                  |
| 0.2ZIF-8      | 1.0655                      | 0.020492                                                    | 77.6511                  |
| 0.3ZIF-8      | 2.5315                      | 0.029163                                                    | 71.6100                  |
| 0.5ZIF-8      | 4.3896                      | 0.003996                                                    | 5.9499                   |
| 1.0ZIF-8      | 1.8699                      | 0.002570                                                    | 6.8688                   |

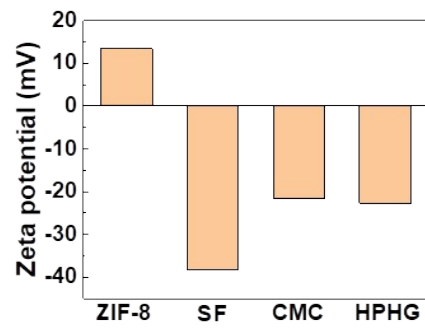

Figure S2. Zeta potential of ZIF-8 aqueous, SF aqueous, CMC aqueous and HPHG precursor.

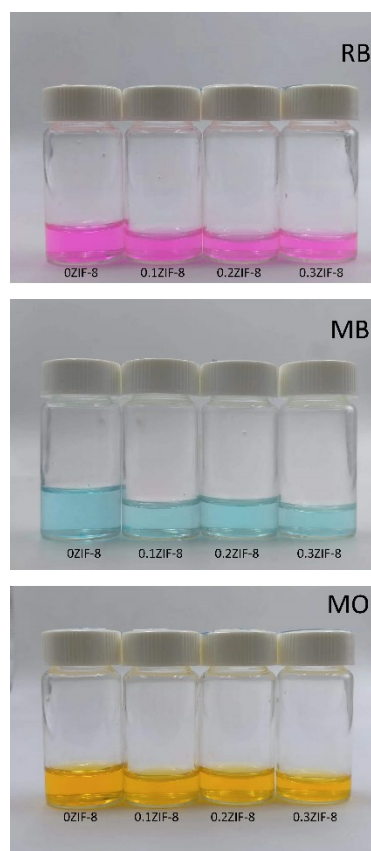

Figure S3. Digital photos of dye solution (RB, MB, and MO) after absorption of HPHG.

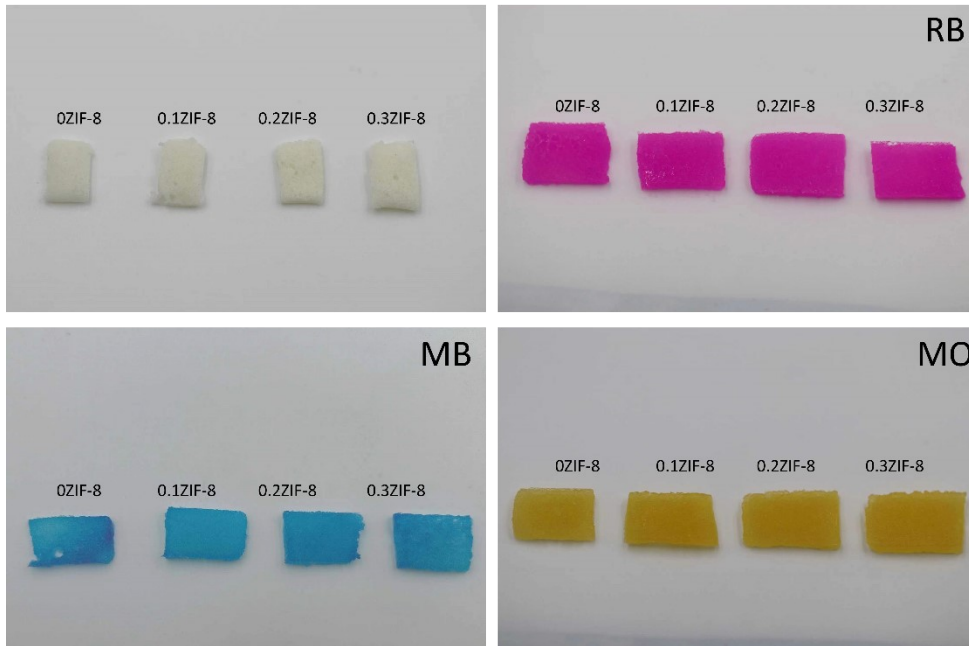

Figure S4. Digital photos of HPHG before and after absorption of different dye.

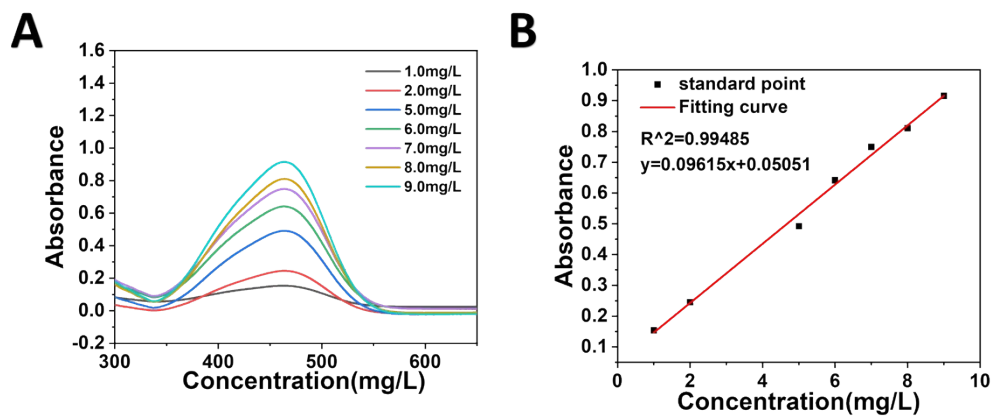

Figure S5. (A) Standard concentration curve of MO. (B) Linear fit curve of MO.

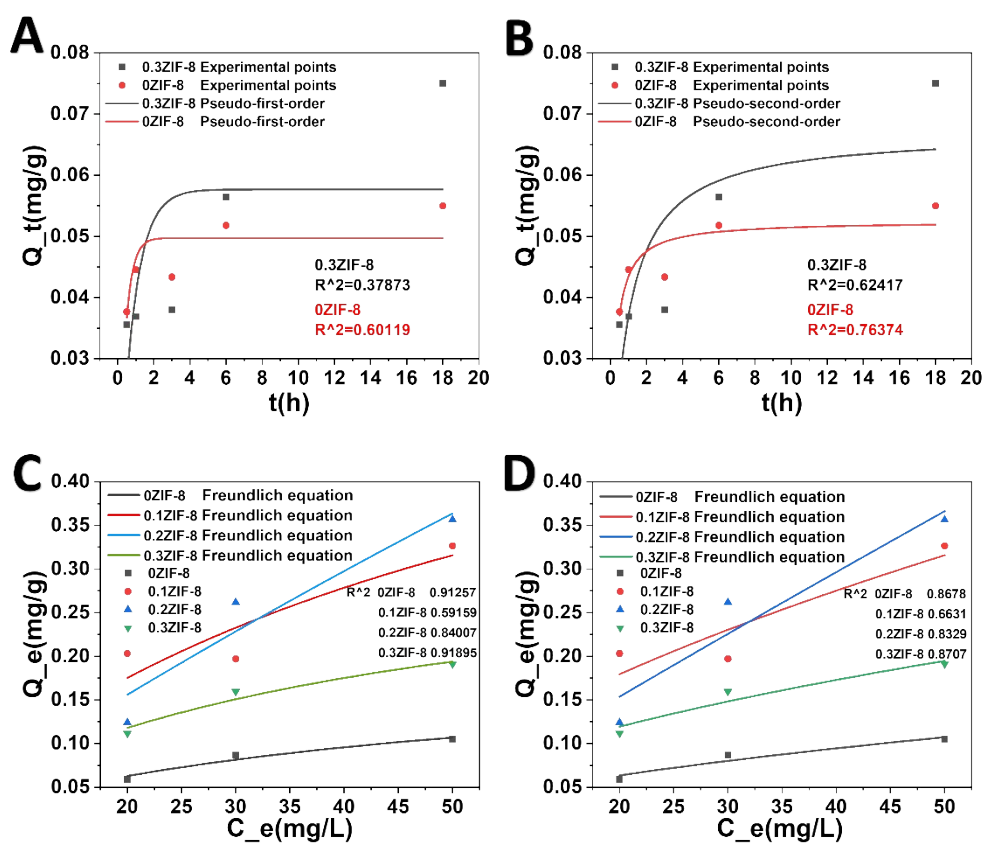

Figure S6. (A) Pseudo-first-order adsorption model and (B) pseudo-second-order adsorption model for the adsorption of MO by HPHG. (C) Langmuir adsorption isotherm and (D) Freundlich adsorption isotherm of MO onto HPHG.

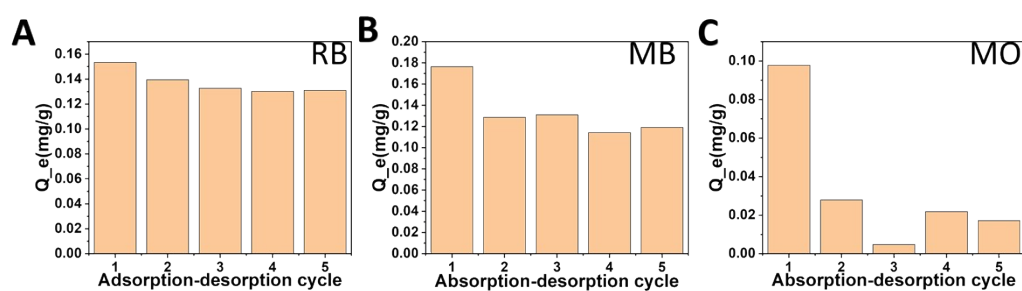

Figure S7. equilibrium absorption capacity of RB, MB, and MO during five adsorption-desorption cycles by HPHG.
